# Supplementary material for: Attentional enhancement predicts individual differences in visual working memory under go/no-go search conditions
Source: PubMed Central journal article supplement (PMC9731499; doi:10.1371/journal.pbio.3001917), 2022-11-28
Supplement: pbio.3001917.s001.pdf [file pbio.3001917.s001.pdf]

**Full title:** Attentional enhancement predicts individual differences in visual working memory under go/no-go search conditions

**Short title:** Attentional enhancement predicts memory capacity

Daniel Tay\*<sup>1</sup> and John J. McDonald<sup>1</sup>

Department of Psychology, Simon Fraser University, Burnaby, British Columbia, Canada

\* daniel\_tay@sfu.ca

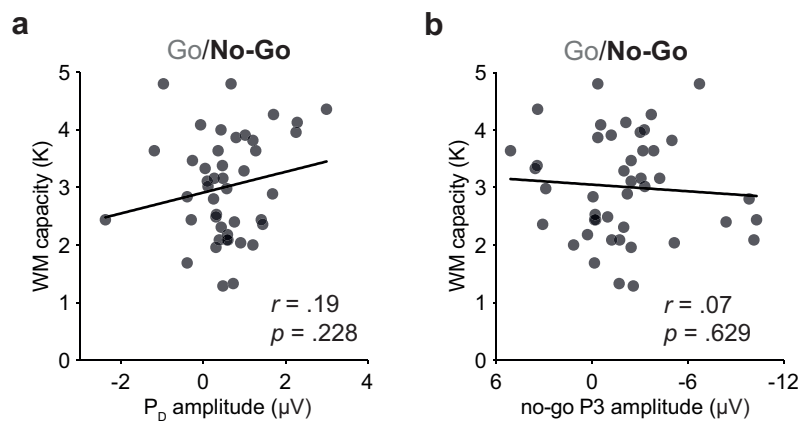

**S1 Fig.** Bivariate relations between individuals' WM capacities and amplitudes of isolated ERP indices of inhibition in Experiment 1. The underlying data supporting this figure can be found at <https://osf.io/4wdzq>.

**(A)** Distractor-suppression activity over the posterior scalp ( $P_D$ ) on No-Go trials of Experiment 1 did not predict WM capacity. **(B)** Response-suppression activity over the central scalp (no-go P3) on No-Go trials of Experiment 1 did not predict WM capacity.
